# Supplementary material for: Ultrafine α‐Phase Molybdenum Carbide Decorated with Platinum Nanoparticles for Efficient Hydrogen Production in Acidic and Alkaline Media
Source: PubMed Central journal article supplement (PMC6468960; doi:10.1002/advs.201802135), 2019-02-21
Supplement: ADVS-6-1802135-s001.pdf [file ADVS-6-1802135-s001.pdf]

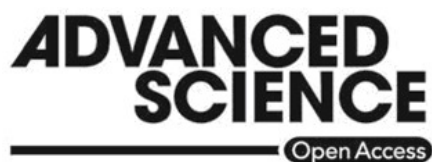

## Supporting Information

for *Adv. Sci.*, DOI: 10.1002/adv.201802135

Ultrafine  $\alpha$ -Phase Molybdenum Carbide Decorated with  
Platinum Nanoparticles for Efficient Hydrogen Production in  
Acidic and Alkaline Media

*Hee Jo Song, Myeong-Chang Sung, Hyunseok Yoon, Bobae  
Ju, and Dong-Wan Kim\**

## Supporting Information

### **Ultrafine $\alpha$ -phase molybdenum carbide decorated with platinum nanoparticles for efficient hydrogen production in acidic and alkaline media**

Hee Jo Song, Myeong-Chang Sung, Hyunseok Yoon, Bobae Ju, and Dong-Wan Kim\*

## Experimental Section

Synthesis of MoC<sub>1-x</sub>-NPs: Ultrafine MoC<sub>1-x</sub>-NPs were prepared through an EWE and a thermal reduction process. Commercial Mo wires (diameter = 0.2 mm) were utilized as precursors. Electrical pulse equipment (NTiminiP, Nano Tech, Korea) was employed to fabricate MoC<sub>1-x</sub>-NPs. EWE was performed at a 40 mm feeding distance and 320 V charging voltage in the media, including methanol, ethanol, isopropyl alcohol (IPA), and oleic acid. After wire-explosion, the MoC<sub>1-x</sub> was washed and filtered several times with methanol, and then dried in a vacuum oven at 70°C. For the improvement of their electrocatalytic activity, as-exploded MoC<sub>1-x</sub>-NPs were thermally treated in the tube furnace that was flowing H<sub>2</sub>(5%)/Ar gas.

Pt decoration on MoC<sub>1-x</sub>-NPs: Pt decoration on MoC<sub>1-x</sub>-NPs is referred to as the aerobic alcohol oxidation process.<sup>[S1]</sup> As-exploded MoC<sub>1-x</sub>-NPs (120 mg) were dispersed in absolute ethanol (60 mL) and ultrasonicated for 30 min, and then transferred to a three-neck, round-bottom flask. An absolute ethanol solution (2.54 mL) containing H<sub>2</sub>PtCl<sub>6</sub> (52.8 mg, Sigma Aldrich) was added to the flask. After mixing, it was refluxed at 70 °C for 2 h with magnetic stirring. After 2 h, 0.2 M NaOH (1.27 mL) solution was added to the flask and refluxed for an additional 30 min to ensure the reduction of the Pt. The mixture was filtered, washed with absolute ethanol and de-ionized water several times, and dried in an electrical oven. In order to control the MoC<sub>1-x</sub>/Pt phase, MoC<sub>1-x</sub>/Pt-NPs were heat-treated in the tube furnace in a reductive atmosphere.

Characterization: XRD patterns of the powder samples were obtained with a Rigaku SmartLab through Cu K $\alpha$  radiation at a scan rate of 5° min<sup>-1</sup>. SEM images with EDS mapping were obtained with a Hitachi SU-70. TEM analysis with EDS mapping was conducted with a JEOL JEM-2100F. FT-IR analysis was completed with the Horiba LabRam Aramis IR2.

Chemical analysis was performed by XPS (Theta probe base system, Thermo Fisher Scientific) and Raman spectrometry (LabRam ARAMIS IR2, HORIBA JOBIN YVON). The concentrations of the elements were determined with ICP-AES (OPTIMA 4300DV, PerkinElmer). The elemental analysis was determined with the Vario MICRO cube.

Electrochemical measurements: The HER electrocatalytic measurements were performed in a three-electrode cell configuration that utilized a rotating disk electrode at a rotation speed of 2000 rpm. A glassy carbon electrode (GCE; 5 mm in diameter) was coated with catalyst ink and utilized as the working electrode. The catalyst ink was prepared by dispersing catalyst (20 mg) in water/IPA solution (750/200  $\mu\text{L}$ ) and 5 wt% Nafion solution (50  $\mu\text{L}$ ), followed by ultrasonication for 30 min. Then, catalyst ink (20  $\mu\text{L}$ ) was dropped onto the GCE and dried under an infrared lamp. For comparison, Pt/C (20 wt% Pt, Johnson Matthey) catalytic ink was prepared in the same way. A saturated calomel electrode (SCE) and Hg/HgO electrode were utilized as the reference electrodes in acidic and alkaline media, respectively. A graphite rod was employed as the counter electrode. A nitrogen gas ( $\text{N}_2$ )-saturated, 0.5 M  $\text{H}_2\text{SO}_4$ , and 1 M KOH solution was the electrolyte. Polarization curves were obtained with linear sweep voltammetry at a scan rate of 5  $\text{mV s}^{-1}$ . All potentials were corrected with iR compensation to remove the ohmic potential and converted to the RHE through the following equation:  $E_{\text{RHE}} = E_{\text{ref}} + 0.0591\text{pH} + E_{\text{ref}}^0$  (where  $E_{\text{SCE}}^0$  and  $E_{\text{Hg/HgO}}^0$  are 0.241 and 0.098, respectively). EIS measurements were performed at a frequency that ranged from 100 kHz to 10 mHz. For the chronopotentiometric test, a carbon paper electrode (CPE; 5 mm  $\times$  5 mm) that was coated with catalyst ink was employed as a working electrode. The Faradaic efficiency was determined by the downward displacement of water at a current density of 50  $\text{mA cm}^{-2}$ .

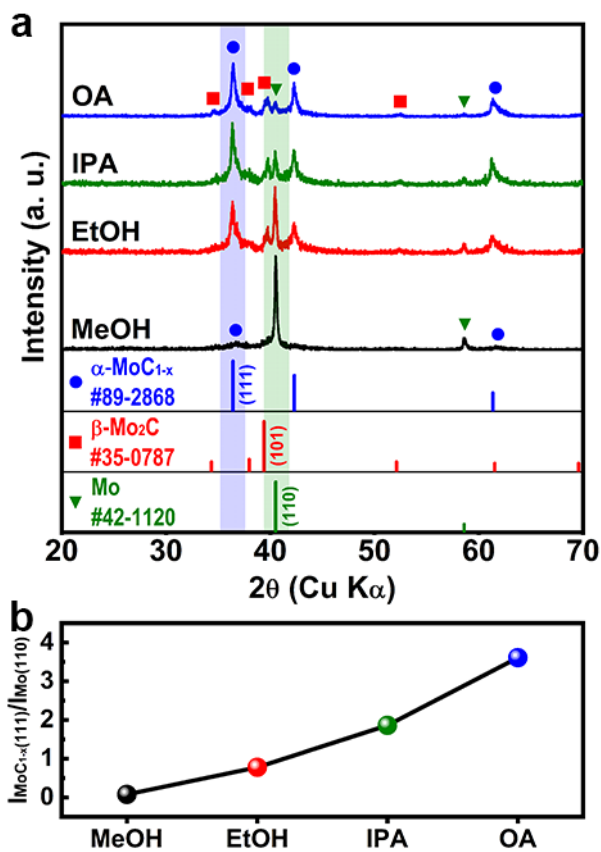

**Figure S1.** (a) XRD patterns of MoC<sub>1-x</sub>-NPs exploded in various organic media. (b) The XRD peak intensity ratio of the MoC<sub>1-x</sub> (111) to the Mo (110) peak.

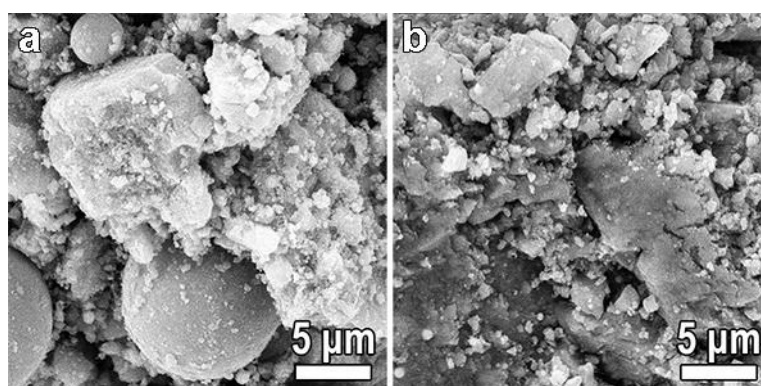

**Figure S2.** SEM images of (a) MoC<sub>1-x</sub> before and (b) MoC<sub>1-x</sub> after filtering with cellulose and micropore filter paper.

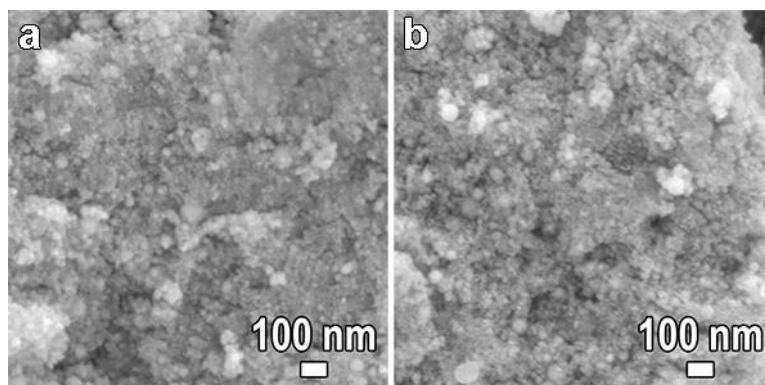

**Figure S3.** SEM images of MoC<sub>1-x</sub>-EWE and MoC<sub>1-x</sub>-600-NPs.

**Table S1.** Elemental analysis of MoC<sub>1-x</sub>-NPs and MoC<sub>1-x</sub>-600-NPs.

| Catalyst                | Elemental analysis (wt%) |     |     |     |
|-------------------------|--------------------------|-----|-----|-----|
|                         | C                        | H   | N   | S   |
| MoC <sub>1-x</sub> -EWE | 28.4                     | 1.3 | 0.1 | 0.2 |
| MoC <sub>1-x</sub> -600 | 17.4                     | 0.9 | 0.1 | 0.2 |

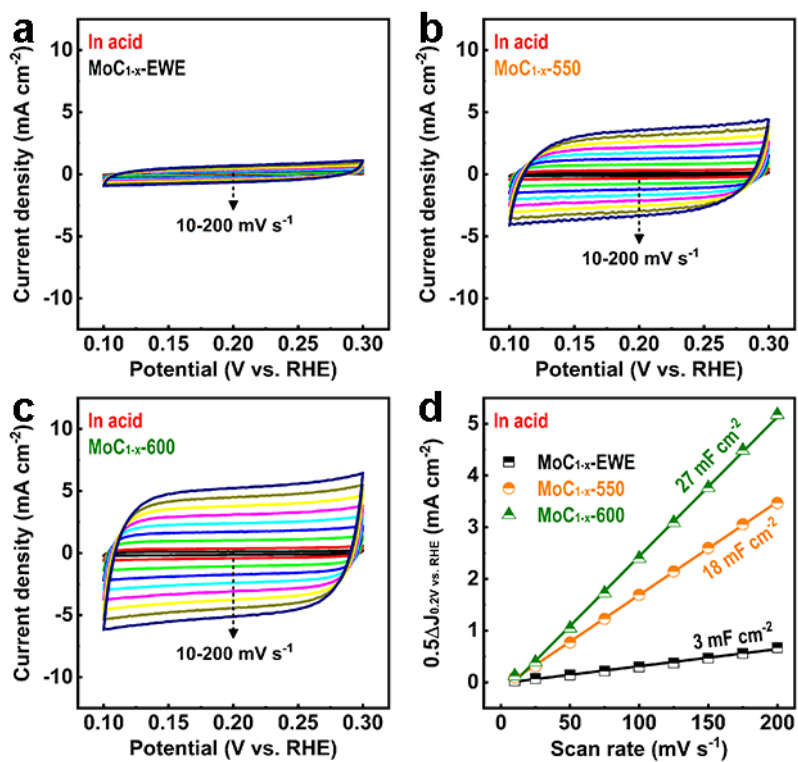

**Figure S4.** CV curves of (a) MoC<sub>1-x</sub>-EWE, (b) MoC<sub>1-x</sub>-550, and (c) MoC<sub>1-x</sub>-600, cycled between 0.1 and 0.3 V (vs. RHE) at a scan rate from 10 to 200 mV s<sup>-1</sup> in an acidic medium. (d) Capacitive current densities as a function of scan rate.

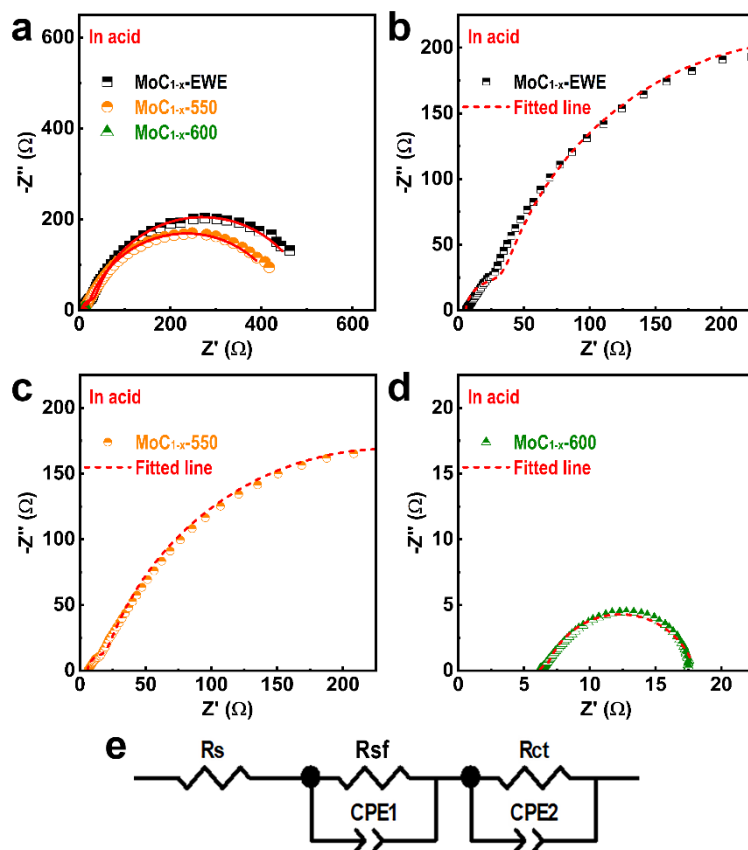

**Figure S5.** Nyquist plots of MoC<sub>1-x</sub>-EWE-NPs, MoC<sub>1-x</sub>-550-NPs, and MoC<sub>1-x</sub>-600-NPs including their fitted line determined by an equivalent circuit. (a) All three samples, (b) MoC<sub>1-x</sub>-EWE-NPs, (c) MoC<sub>1-x</sub>-550-NPs, (d) MoC<sub>1-x</sub>-600-NPs, (e) equivalent circuit.

**Table S2.** Fitting data determined by equivalent circuits.

| Sample                      | Element            |                       |                       |
|-----------------------------|--------------------|-----------------------|-----------------------|
|                             | $R_s$ ( $\Omega$ ) | $R_{sf}$ ( $\Omega$ ) | $R_{ct}$ ( $\Omega$ ) |
| MoC <sub>1-x</sub> -EWE-NPs | 6                  | 25                    | 480                   |
| MoC <sub>1-x</sub> -550-NPs | 6.1                | 11                    | 438                   |
| MoC <sub>1-x</sub> -600-NPs | 6                  | 0.5                   | 10                    |



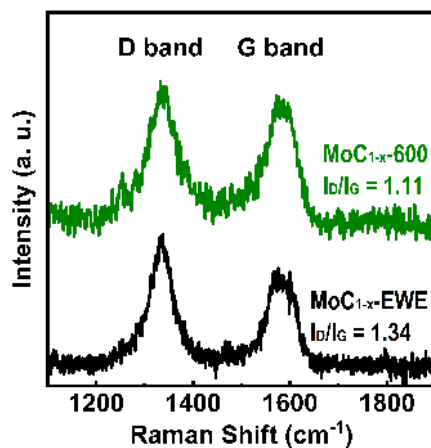

**Figure S6.** Raman spectra of MoC<sub>1-x</sub>-EWE-NPs and MoC<sub>1-x</sub>-600-NPs.

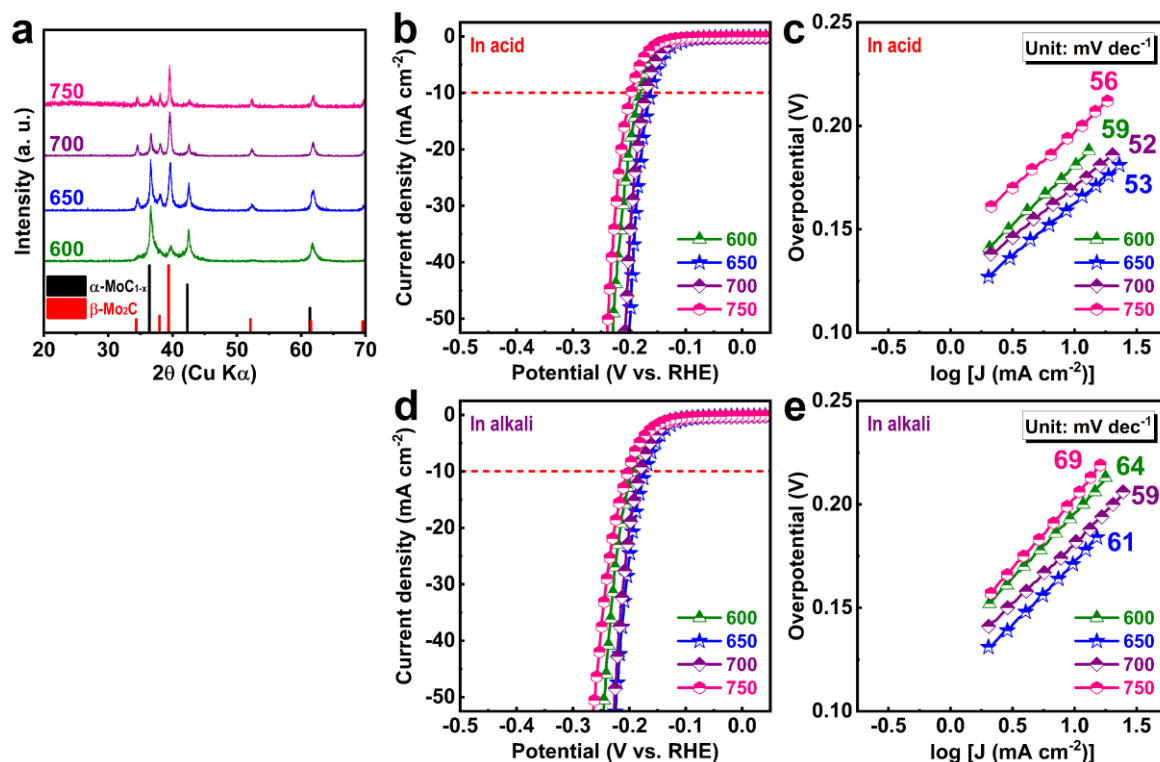

**Figure S7.** (a) XRD patterns of MoC<sub>1-x</sub>-600-NPs, MoC<sub>1-x</sub>-650-NPs, MoC<sub>1-x</sub>-700-NPs and MoC<sub>1-x</sub>-750-NPs, and their electrocatalytic performance measured (b,c) in acidic and (d,e) alkaline media. (b,d) Polarization curves at a scan rate of 5 mV s<sup>-1</sup>, and (c,e) the corresponding Tafel plots.

**Table S3.** Mo and Pt concentration in MoC<sub>1-x</sub>/Pt-600-NPs determined by ICP-AES analysis.

|                         | Mo                   | Pt                  | MoC                    |
|-------------------------|----------------------|---------------------|------------------------|
| Concentration (ppm)     | 706729<br>(measured) | 25050<br>(measured) | 795204<br>(calculated) |
| Atomic/molecular weight | 95.94                | 195.078             | 107.9507               |

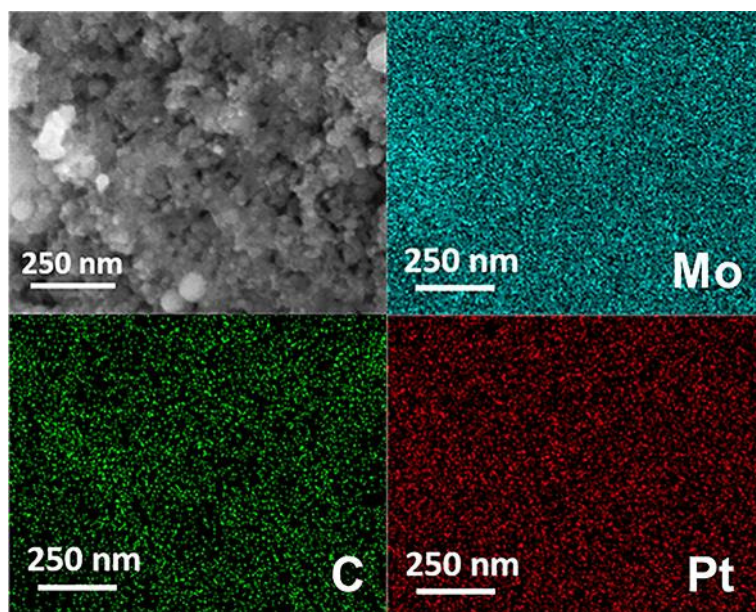**Figure S8.** The SEM EDS elemental mapping of MoC<sub>1-x</sub>/Pt-600-NPs.

**Table S4.** Comparison of HER performance with  $\alpha$ - $\text{MoC}_{1-x}$ -based electrocatalysts measured in acidic and alkaline media.

| Catalyst                                                 | Acid                |                            | Alkali              |                            | Loading<br>( $\text{mg}/\text{cm}^2$ ) | Electrode       | Durability<br>(h) | Ref. |
|----------------------------------------------------------|---------------------|----------------------------|---------------------|----------------------------|----------------------------------------|-----------------|-------------------|------|
|                                                          | $\eta_{10}$<br>(mV) | Tafel<br>slope<br>(mV/dec) | $\eta_{10}$<br>(mV) | Tafel<br>slope<br>(mV/dec) |                                        |                 |                   |      |
| $\alpha$ - $\text{MoC}_{1-x}/\text{Mo}_2\text{C}$<br>NWs | 126                 | 43                         | 120                 | 42                         | 0.14                                   | GC              | 20                | S2   |
| H- Induced<br>$\text{Mo}_2\text{C}$ Hybrid               | 152                 | 65                         | 121                 | 54                         | -                                      | GC              | 5.5               | S3   |
| 2D porous<br>$\text{Mo}_2\text{C}$<br>nanostructures     | 71                  | 40                         | 92                  | 47                         | 0.55                                   | GC              | 16                | S4   |
| 2D $\text{Mo}_2\text{C}$                                 | 236                 | 73                         | -                   | -                          | -                                      | GC              | -                 | S5   |
| 3D hierarchical<br>porous $\text{Mo}_2\text{C}$          | 166                 | 75                         | 139                 | 71                         | 0.4                                    | GC              | 12                | S6   |
| $\text{MoC}/\text{C}$ NPs                                | 130                 | 63.6                       | -                   | -                          | 0.57                                   | GC              | 20                | S7   |
| $\text{Mo}_2\text{C}@$<br>hierarchical<br>porous carbon  | 145                 | 48.2                       | -                   | -                          | 0.357                                  | GC              | 12                | S8   |
| N,P-doped<br>$\alpha$ - $\text{MoC}_{1-x}$ NFs           | 107                 | 65.1                       | 135                 | 57.1                       | 0.265                                  | Carbon<br>fiber | 10                | S9   |
| Mesoporous<br>$\text{Mo}_2\text{C}@C$ NW<br>arrays       | 125                 | 66                         | -                   | -                          | 0.2                                    | GC              | -                 | S10  |
| W-doped $\text{Mo}_x\text{C}$                            | 125                 | 56                         | 70                  | 44                         | 0.35                                   | GC              | 24                | S11  |
| $\text{Mo}_2\text{C}$ NPs@                               | 91                  | -                          | 89                  | 51                         | 1                                      | Ni foam         | 20                | S12  |

|                                                   |     |      |     |      |       |         |    |              |
|---------------------------------------------------|-----|------|-----|------|-------|---------|----|--------------|
| porous carbon                                     |     |      |     |      |       |         |    |              |
| B-,N-doped                                        |     |      |     |      |       |         |    |              |
| Mo <sub>2</sub> C NPs@<br>carbon                  | -   | -    | 100 | 62   | 1     | Ni foam | 20 | S13          |
| Mo/Mo <sub>2</sub> C NSs                          |     |      |     |      |       |         |    |              |
|                                                   | 89  | 70.7 | 79  | 62.8 | 0.285 | GC      | 20 | S14          |
| Mo/ $\alpha$ -MoC <sub>1-x</sub><br>NRs           |     |      |     |      |       |         |    |              |
|                                                   | 110 | 81.7 | -   | -    | 2.1   | GC      | 12 | S15          |
| Mo <sub>2</sub> C@carbon<br>nanomesh              |     |      |     |      |       |         |    |              |
|                                                   | 30  | 33.7 | -   | -    | 0.5   | GC      | 16 | S16          |
| Mo <sub>2</sub> N-No <sub>2</sub> C@<br>rGO       |     |      |     |      |       |         |    |              |
|                                                   | 160 | 55   | 150 | 51   | 0.337 | GC      | 50 | S17          |
| 2D Mo <sub>2</sub> C-Co                           |     |      |     |      |       |         |    |              |
|                                                   | 48  | 39   | -   | -    | 1     | CP      | -  | S18          |
| Mo <sub>2</sub> C NPs/<br>graphene/<br>carbon     |     |      |     |      |       |         |    |              |
|                                                   | 70  | 39   | 66  | 37   | 0.57  | GC      | 20 | S19          |
| Mo-Mo <sub>2</sub> C                              |     |      |     |      |       |         |    |              |
|                                                   | 150 | 55   | -   | -    | 0.38  | GC      | 12 | S20          |
| Mo <sub>2</sub> C/carbon<br>NPs                   |     |      |     |      |       |         |    |              |
|                                                   | 119 | 67   | 85  | 49   | 0.35  | GC      | 50 | S21          |
| $\alpha$ -MoC <sub>1-x</sub><br>nanoparticles     |     |      |     |      |       |         |    |              |
|                                                   | 180 | 59   | 195 | 64   | 2     | GC      | 50 | This<br>work |
| $\alpha$ -MoC <sub>1-x</sub> /Pt<br>nanoparticles |     |      |     |      |       |         |    |              |
|                                                   | 30  | 31   | 67  | 55   | 2     | GC      | 50 | This<br>work |
| Pt/C                                              |     |      |     |      |       |         |    |              |
|                                                   | 30  | 30   | 50  | 40   | 2     | GC      | -  | This<br>work |

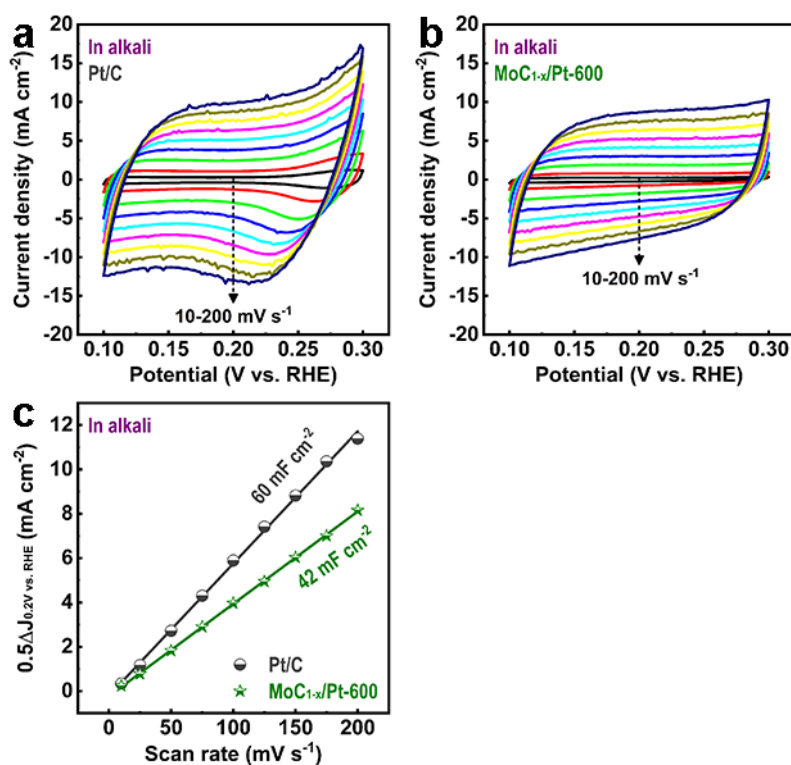

**Figure S9.** CV curves of (a) Pt/C and (b) MoC<sub>1-x</sub>/Pt-600-NPs cycled between 0.1 and 0.3 V (vs. RHE) at a scan rate from 10 to 200 mV s<sup>-1</sup> in an alkaline medium. (c) Capacitive current densities as a function of scan rate.

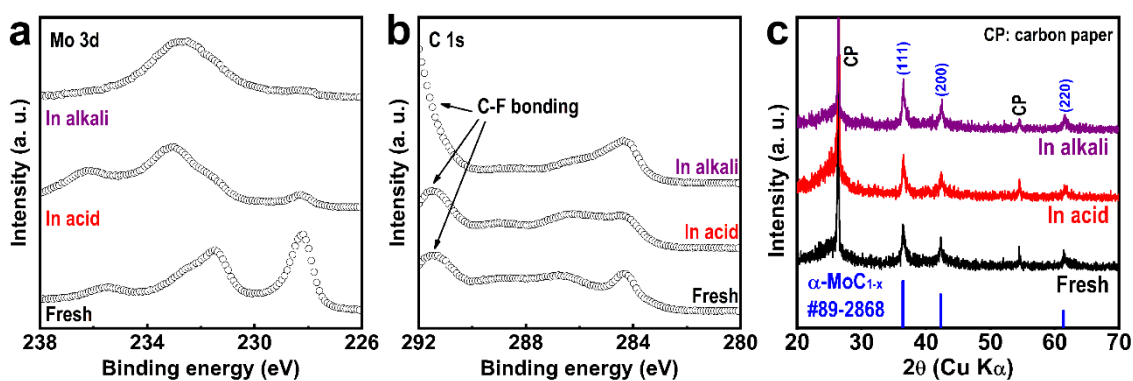

**Figure S10.** Characterization after electrocatalytic HER test. (a) Mo 2p, (b) C 1s XPS spectra, and (c) XRD patterns of MoC<sub>1-x</sub>/Pt-600-NPs electrode before and after the chronopotentiometric test in acidic and alkaline media.

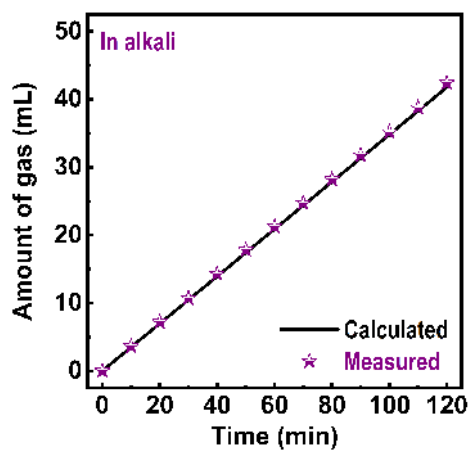

**Figure S11.** Theoretically calculated and experimentally measured volume of H<sub>2</sub> for the MoC<sub>1-x</sub>/Pt-600-NPs as a function of time in alkaline medium.

**Supplementary Note 1**

Synthesis of  $\text{MoC}_{1-x}$ -EWE-NPs by the electrical Mo-wire explosion process.

Commercial Mo wire was continuously fed with an automatic system. The electrically superheated Mo-wire repeatedly underwent evaporation by explosion, scattering, and condensation, which produced  $\text{MoC}_{1-x}$ -NPs that were dispersed in a liquid medium. When the Mo wire was exploded in methanol (which has low carbon content), the major product was Mo, as opposed to the  $\text{MoC}_{1-x}$  phase (Figure S1a). The  $\text{MoC}_{1-x}$  phase is observed when the Mo wire is exploded in ethanol, IPA, and oleic acid (Figure S1a). Interestingly, as the carbon content of the organic media increases, the XRD peak intensity ratio of  $\text{MoC}_{1-x}$  (111) to Mo (110) also increases (Figure S1b), which suggests that oleic acid provides more carbon for evaporation of Mo, resulting in the production of larger quantities of  $\text{MoC}_{1-x}$ -NPs.

Although some micron-sized particles were formed after the EWE process, these byproducts were filtered with cellulose and micropore filter paper (Figure S2). After this, only the  $\alpha$ - $\text{MoC}_{1-x}$  phase was observed in the XRD pattern (lower graph in Figure 2a). This indicates that the micron-sized byproducts were Mo and  $\text{Mo}_2\text{C}$ .

**Supplementary Note 2**

Evaluation of Pt content in MoC<sub>1-x</sub>/Pt-600-NPs.

By ICP-AES analysis, we obtained the concentration of Mo and Pt elements in MoC<sub>1-x</sub>/Pt-600-NPs (Table S3). Suppose that MoC<sub>1-x</sub>/Pt-600-NPs are comprised of MoC and Pt, concentration of MoC is calculated as follows.

$$\text{MoC concentration} = \text{Mo concentration} \times \frac{\text{molecular weight of MoC}}{\text{atomic weight of Mo}} = 795204$$

So, Pt content in MoC<sub>1-x</sub>/Pt-600-NPs is calculated as follows.

$$\text{Pt content(wt\%)} = \frac{\text{Pt concentration}}{(\text{MoC} + \text{Pt}) \text{ concentration}} \times 100 = 3.05$$

However, because MoC<sub>1-x</sub>/Pt-600-NPs contain certain amount of carbon layer, Pt content is probably lower than 3.05 wt%. Meanwhile, we investigated the SEM EDS elemental mapping of MoC<sub>1-x</sub>/Pt-600-NPs in which Pt content was estimated to be 2.7 wt% (Figure S8). So, we concluded that Pt content in MoC<sub>1-x</sub>/Pt-600 NPs is 2.7-3 wt%.



**Supplementary Note 3**

Calculation of electrochemically active surface area (ECSA).

ECSA was estimated from double-layer capacitance ( $C_{dl}$ ). ECSA was calculated by dividing the  $C_{dl}$  using the specific surface capacitance ( $C_s$ ) of the electrode surface:

$$\mathbf{ECSA} = \frac{C_{dl}}{C_s}$$

Since the exact values of  $C_s$  for all electrocatalysts are not available, a commonly used  $C_s$  value ( $0.04 \text{ mF cm}^{-2}$  in alkaline media) for metal surfaces was used in this study.<sup>[S22,S23]</sup> The geometric surface area of glassy carbon electrode is  $0.196 \text{ cm}^2$ .

## Reference

- [S1] Y. Zhang, Y.-C. Hsieh, V. Volkov, D. Su, W. An, R. Si, Y. Zhu, P. Liu, J. X. Wang, R. R. Adzic, *ACS Catal.* **2014**, 4, 738.
- [S2] H. Lin, Z. Shi, S. He, X. Yu, S. Wang, Q. Gao, Y. Tang, *Chem. Sci.* **2016**, 7, 3399-3405.
- [S3] X. Fan, Y. Liu, Z. Peng, Z. Zhang, H. Zhou, X. Zhang, B. I. Yakobson, W.A. Goddard III, R. H. Hauge, J. M. Tour, *ACS Nano* **2017**, 11, 384-394.
- [S4] J. Wan, J. Wu, X. Gao, T. Li, Z. Hu, H. Yu, L. Huang, *Adv. Funct. Mater.* **2017**, 27, 1703933.
- [S5] D. Geng, X. Zhao, Z. Chen, W. Sun, W. Fu, J. Chen, W. Liu, W. Zhou, K. P. Loh. *Adv. Mater.* **2017**, 29, 1700072.
- [S6] T. Meng, L. Zheng, J. Qin, D. Zhao, M. Cao. *J. Mater. Chem. A* **2017**, 5, 20228-20238.
- [S7] C. Lv, Z. Huang, Q. Yang, G. Wei, Z. Chen, M. G. Humphrey, C. Zhang, *J. Mater. Chem. A* **2017**, 5, 22805-22812.
- [S8] J. Jia, W. Zhou, Z. Wei, T. Xiong, G. Li, L. Zhao, X. Zhang, H. Liu, J. Zhou, S. Chen, *Nano Energy* **2017**, 41, 749-757.
- [S9] L. Ji, J. Wang, X. Teng, H. Dong, X. He, Z. Chen, *ACS Appl. Mater. Interfaces* **2018**, 10, 14632-14640.
- [S10] J. Zhu, Y. Yao, Z. Chen, A. Zhang, M. Zhou, J. Guo, W.D. Wu, X.D. Chen, Y. Li, Z. Wu, *ACS Appl. Mater. Interfaces* **2018**, 10, 18761-18770.
- [S11] K. Zhang, G. Zhang, J. Qu, H. Liu, *ACS Appl. Mater. Interfaces* **2018**, 10, 2451-2459.
- [S12] J. T. Ren, L. Chen, C. C. Weng, G. G. Yuan, Z. Y. Yuan, *ACS Appl. Mater. Interfaces* **2018**, 10, 33276-33286.
- [S13] M. A. R Anjum, M. H. Lee, J. S. Lee, *ACS Catal.* **2018**, 8, 8296-8305.
- [S14] J. Xiong, J. Li, J. Shi, X. Zhang, N. T. Suen, Z. Liu, Y. Huang, G. Xu, W. Cai, X. Lei, L. Feng, Z. Yang, L. Huang, H. Cheng, *ACS Energy Lett.* **2018**, 3, 341-348.

- [S15] J. Diao, W. Yuan, Y. Su, Y. Qiu, X. Guo, *Adv. Mater. Interfaces* **2018**, 5, 1800223.
- [S16] Z. Cheng, Q. Fu, Q. Han, Y. Xiao, Y. Liang, Y. Zhao, L. Qu, *Adv. Funct. Mater.* **2018**, 28, 1705967.
- [S17] H. Yan, Y. Xie, Y. Jiao, A. Wu, C. Tian, X. Zhang, L. Wang, H. Fu, *Adv. Mater.* **2018**, 30, 1704156.
- [S18] X. Zang, W. Chen, X. Zou, J. N. Hohman, L. Yang, B. Li, M. Wei, C. Zhu, J. Liang, M. Sanghadasa, J. Gu, L. Lin, *Adv. Mater.* **2018**, 1805188.
- [S19] H. Wei, Q. Xi, X. Chen, D. Guo, F. Ding, Z. Yang, S. Wang, J. Li, S. Huang, *Adv. Sci.* **2018**, 5, 1700733.
- [S20] J. Dong, Q. Wu, C. Huang, W. Yaok Q. Xu, *J. Mater. Chem. A* **2018**, 6, 10028-10035.
- [S21] L. Diao, J. Qin, N. Zhao, C. Shi, E. Liu, F. He, L. Ma, J. Li, C. He, *J. Mater. Chem. A* **2018**, 6, 6054.
- [S22] C. C. L. McCrory, S. Jung, J. C. Peters, T. F. Jaramillo, *J. Am. Chem. Soc.* **2013**, 135, 16977– 16987.
- [S23] Y. Zhang, L. Gao, E. J. M. Hensen, J. P. Hofmann, *ACS Energy Lett.* **2018**, 3, 1360-1365.
